# Supplementary material for: Phytoconstituents of Androstachys johnsonii Prain Prevent Reactive Oxygen Species Production and Regulate the Expression of Inflammatory Mediators in LPS-Stimulated RAW 264.7 Macrophages
Source: MDPI journal article supplement (doi:10.3390/antiox13040401), 2024-03-27
Supplement: s1 [file s1]

## Supplementary material

# Phytoconstituents of *Androstachys johnsonii* Prain Prevent Reactive Oxygen Species Production and Regulate the Expression of Inflammatory Mediators in LPS-Stimulated RAW 264.7 Macrophages

Emmanuel Mfotie Njoya \*, Gaetan T. Tabakam, Chika I. Chukwuma, Samson S. Mashele and Tshepiso J. Makhafole \*

Centre for Quality of Health and Living, Faculty of Health and Environmental Sciences,  
Central University of Technology, Bloemfontein 9300, Free State, South Africa;  
tgaetan@cut.ac.za (G.T.T.);  
cchukwuma@cut.ac.za (C.I.C.); smashele@cut.ac.za (S.S.M.)

\* Correspondence: mfotiefr@yahoo.fr or enjoya@cut.ac.za (E.M.N.); jmakhafole@cut.ac.za (T.J.M.)

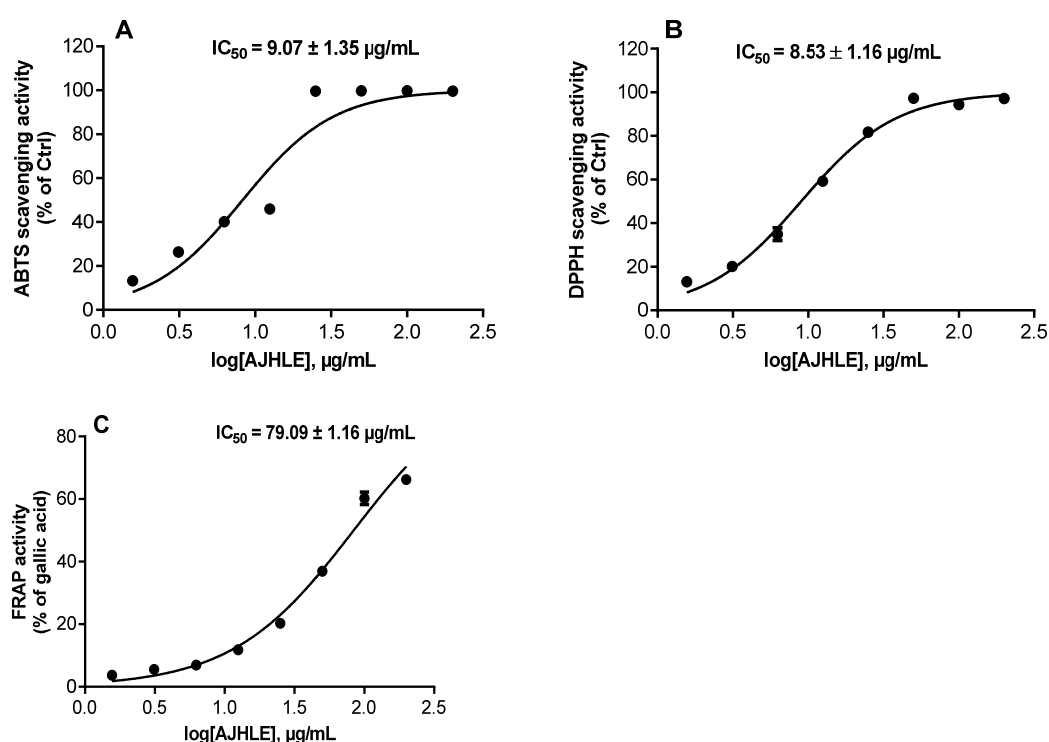

**Figure S1:** Non-linear regression curves for IC<sub>50</sub> determination of *Androstachys johnsonii* hydroethanolic leaf extract (AJHLE) in ABTS (A), DPPH (B), and FRAP (C) assays.

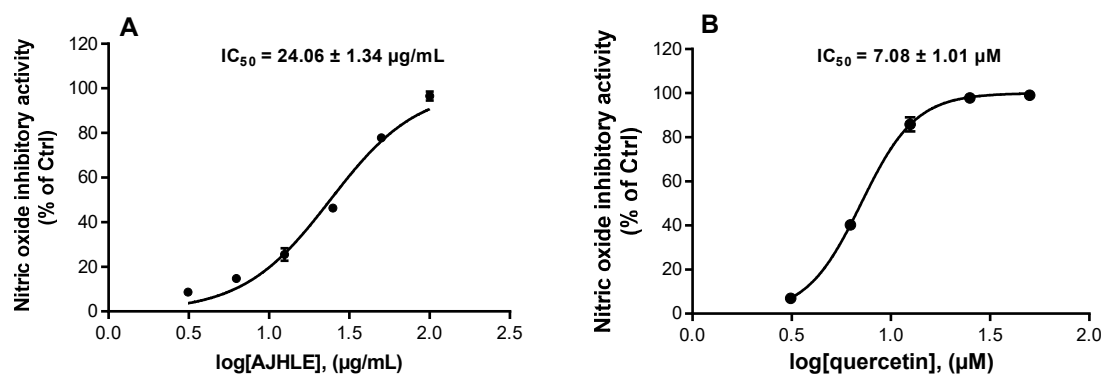

**Figure S2:** Non-linear regression curves for  $IC_{50}$  determination of *Androstachys johnsonii* hydroethanolic leaf extract (AJHLE) (A) and quercetin (B) in nitric oxide (NO) production inhibitory assay.

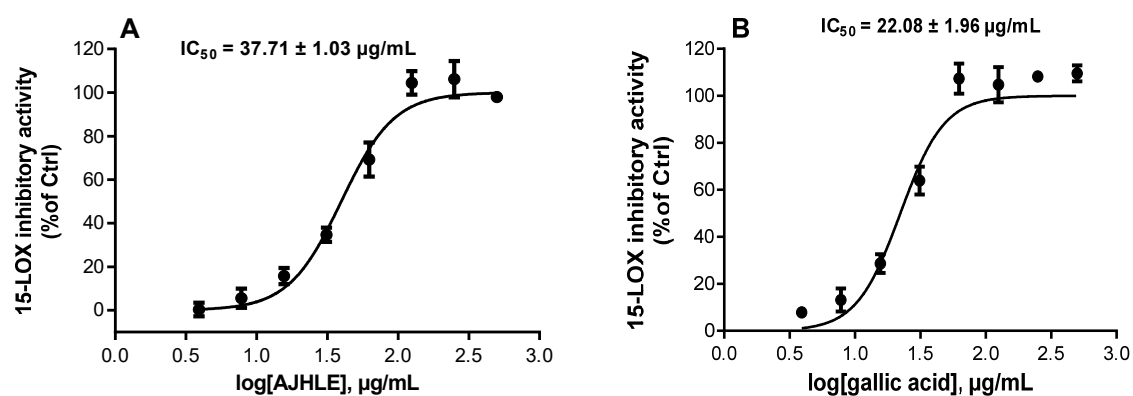

**Figure S3:** Non-linear regression curves for  $IC_{50}$  determination of *Androstachys johnsonii* hydroethanolic leaf extract (AJHLE) (A) and gallic acid (B) in 15-lipoxygenase (15-LOX) inhibitory assay.
